# Supplementary material
Source: Springer Nature journal article supplement (https://www.springermedizin.de/resource/supplementary/12881_2006_165_MOESM1_ESM.pdf/9452554)

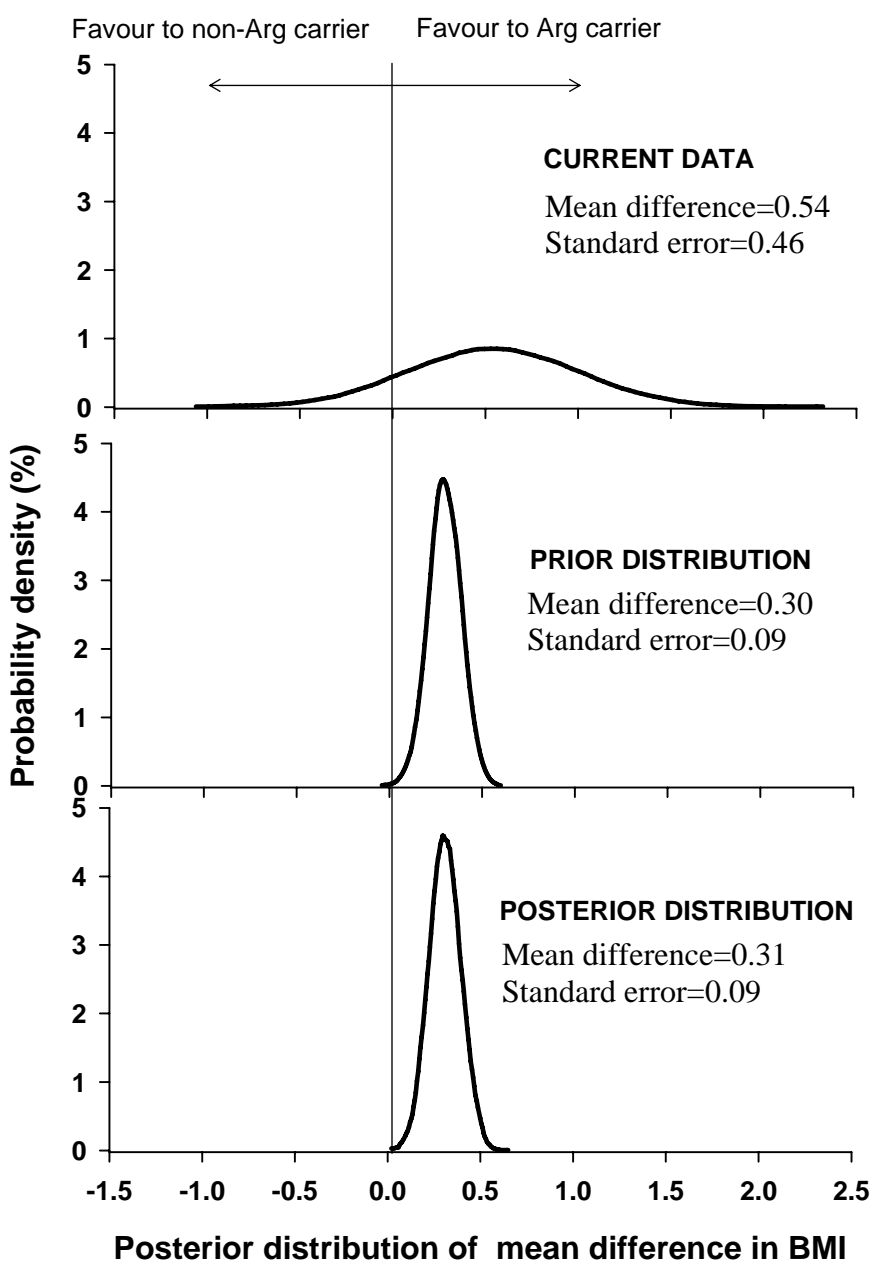

Supplement: MOESM1 [file 9452554]
